# Supplementary material
Source: publisher figshare collection journal article supplement (https://frontiersin.figshare.com/ndownloader/files/14081249)
Supplement: Supplementary file [file 14081249]

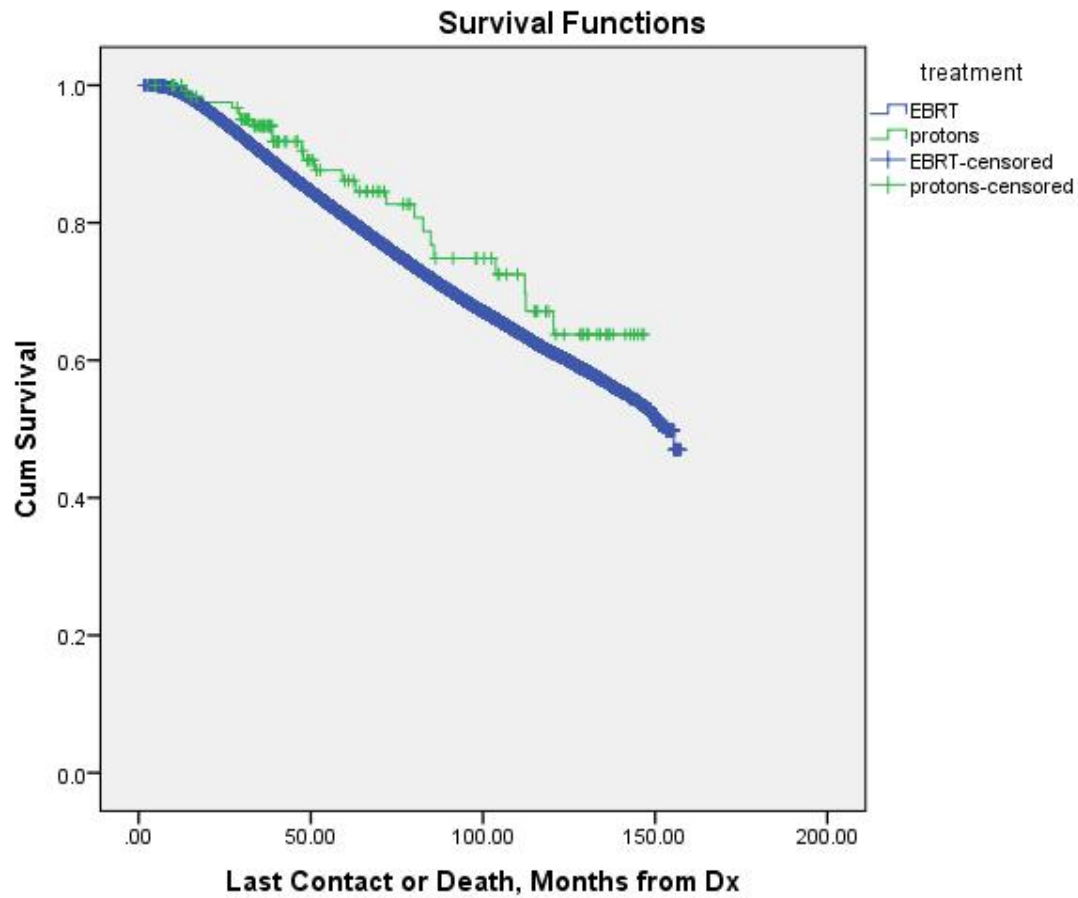

**Supplemental Figure 5:** Overall Survival with Proton vs. Non-Proton EBRT in Received Lymph Node Irradiation Cohort

5-year Overall Survival

- Non-Proton (EBRT): 80.8%
- Protons: 86.1%

p-value=0.140
